# Supplementary material for: Polyelectrolyte multilayer microcapsules templated on spherical, elliptical and square calcium carbonate particles
Source: Royal Society of Chemistry journal article supplement (doi:10.1039/c2tb00416j), 2013-01-01
Supplement: c2tb00416j.pdf [file c2tb00416j.pdf]

# Supplementary Information

## Polyelectrolyte multilayer microcapsules templated on spherical, elliptical and square calcium carbonate particles

Alexey Yashchenok<sup>\*1</sup>, Bogdan Parakhonskiy<sup>2,3</sup>, Senem Donatan<sup>1</sup>, Dorothee Kohler<sup>1</sup>, Andre Skirtach<sup>1,4</sup>,  
Helmuth Möhwald<sup>1</sup>

<sup>1</sup> Department of Interfaces, Max-Planck Institute of Colloids and Interfaces, Golm/Potsdam, D14476, Germany. E-mail: [alexey.yashchenok@mpikg.mpg.de](mailto:alexey.yashchenok@mpikg.mpg.de)

<sup>2</sup> Italy BIOTech, University of Trento, Mattarello, Italy

<sup>3</sup> Shubnikov Institute of Crystallography, Russian Academy of Science, Moscow, Russia

<sup>4</sup> Department of Molecular Biotechnology, Ghent University, Ghent 9000, and NB-Photonics, Ghent University, Ghent 9000

Received/Accepted

DOI:

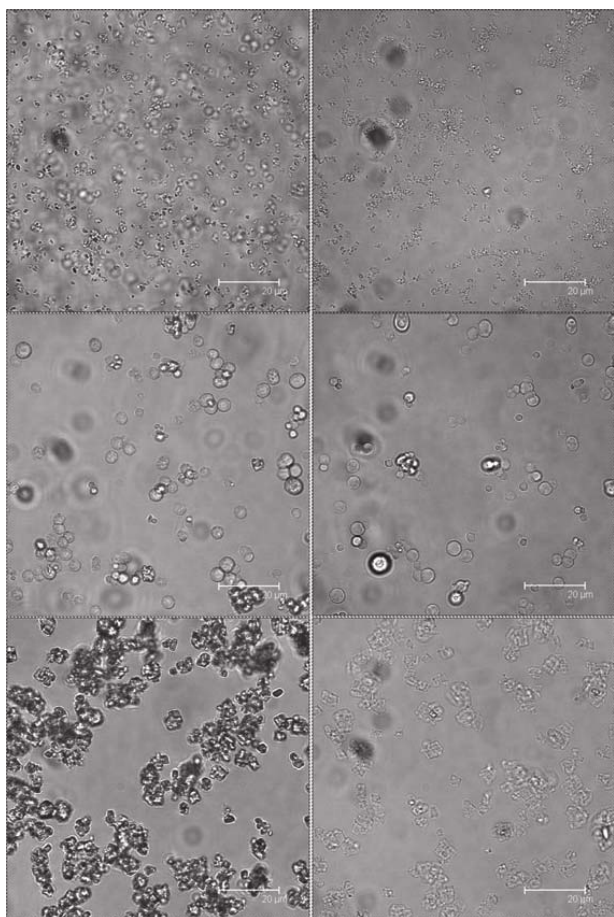

**Fig. S1.** Confocal laser scanning transmission images of CaCO<sub>3</sub> microparticles (left-hand side) and hollow microcapsules comprising four bilayers of PAH/PSS after decomposition of the core by EDTA (right-hand side).
